# Supplementary material for: Association of Low Handgrip Strength with Chemotherapy Toxicity in Digestive Cancer Patients: A Comprehensive Observational Cohort Study (FIGHTDIGOTOX)
Source: MDPI journal article supplement (doi:10.3390/nu14214448), 2022-10-22
Supplement: s1 [file s1]

**Supplementary Table S1.** Population characteristics according to low and normal hand grip strength based on the median (exploratory low HGS).

| Characteristics of patients              | Level                          | Overall          | Dynapenia <sup>1</sup> | Normal HGS <sup>1</sup> | <i>p</i> -value |
|------------------------------------------|--------------------------------|------------------|------------------------|-------------------------|-----------------|
| Total, <i>n</i> (%)                      |                                | 244              | 107 (43.9)             | 137 (56.1)              |                 |
| Sex, <i>n</i> (%)                        | Female                         | 109 (44.7)       | 50 (46.7)              | 59 (43.1)               | 0.659           |
|                                          | Male                           | 135 (55.3)       | 57 (53.3)              | 78 (56.9)               |                 |
| Age, median (IQR)                        |                                | 69.0 (59.0-74.0) | 72.0 (68.0 - 78.0)     | 63.0 (56.0 - 71.0)      | <0.001          |
| BMI, median (IQR)                        |                                | 24.6 (21.5-28.6) | 24.9 (21.5 - 29.4)     | 24.3 (21.6 - 27.5)      | 0.522           |
| ECOG PS, <i>n</i> (%)                    | 0                              | 66 (27.0)        | 20 (18.7)              | 46 (33.6)               | 0.006           |
|                                          | 1                              | 150 (61.5)       | 68 (63.6)              | 82 (59.9)               |                 |
|                                          | 2                              | 26 (10.7)        | 17 (15.9)              | 9 (6.6)                 |                 |
|                                          | 3                              | 2 (0.8)          | 2 (1.9)                |                         |                 |
| Serum albumin level, median (IQR)        |                                | 39.0 (36.0-42.0) | 39.0 (34.0 - 41.5)     | 39.0 (37.0 - 42.0)      | 0.153           |
| CRP, median (IQR)                        |                                | 9.0 (4.0-33.2)   | 11.0 (4.0 - 36.5)      | 8.0 (3.0-33.0)          | 0.121           |
| mGPS, <i>n</i> (%)                       | 0                              | 118 (48.4)       | 46 (43.0)              | 72 (52.6)               | 0.020           |
|                                          | 1                              | 87 (35.7)        | 36 (33.6)              | 51 (37.2)               |                 |
|                                          | 2                              | 39 (16.0)        | 25 (23.4)              | 14 (10.2)               |                 |
| Lymphopenia, <i>n</i> (%)                | No                             | 226 (92.6)       | 99 (92.5)              | 127 (92.7)              | 1.000           |
|                                          | Yes                            | 18 (7.4)         | 8 (7.5)                | 10 (7.3)                |                 |
| G8 score, median <sup>2</sup> (IQR)      |                                | 12.0 (11.0-15.0) | 12.0 (10.0 - 13.8)     | 13.0 (11.0-15.0)        | 0.050           |
| Primary tumor location, <i>n</i> (%)     | Colon and rectum               | 105 (43.2)       | 55 (51.4)              | 50 (36.8)               | 55 (51.4)       |
|                                          | Stomach                        | 26 (10.7)        | 6 (5.6)                | 20 (14.7)               |                 |
|                                          | Esophagus                      | 18 (7.4)         | 10 (9.3)               | 8 (5.9)                 |                 |
|                                          | Pancreas                       | 69 (28.4)        | 28 (26.2)              | 41 (30.1)               |                 |
|                                          | Others <sup>3</sup>            | 25 (10.2)        | 8 (7.5)                | 17 (12.5)               |                 |
|                                          |                                |                  |                        |                         |                 |
| Stage, <i>n</i> (%)                      | Localized                      | 84 (34.4)        | 39 (36.4)              | 45 (32.8)               | 0.707           |
|                                          | Locally-advanced               | 57 (23.4)        | 26 (24.3)              | 31 (22.6)               |                 |
|                                          | Metastatic                     | 103 (42.2)       | 42 (39.3)              | 61 (44.5)               |                 |
| Number of metastatic sites, <i>n</i> (%) | 1                              | 68 (65.4)        | 28 (65.1)              | 40 (65.6)               | 1.000           |
|                                          | ≥ 2                            | 36 (34.6)        | 15 (34.9)              | 21 (34.4)               |                 |
| Chemotherapy regimen, <i>n</i> (%)       | 5FU + Oxaliplatin              | 96 (39.3)        | 46 (43.0)              | 50 (36.5)               | 0.072           |
|                                          | 5FU + Irinotecan + Oxaliplatin | 69 (28.3)        | 22 (20.6)              | 47 (34.3)               |                 |
|                                          | 5FU alone                      | 24 (9.8)         | 15 (14.0)              | 9 (6.6)                 |                 |
|                                          | Gemcitabine                    | 18 (7.4)         | 9 (8.4)                | 9 (6.6)                 |                 |
|                                          | Others <sup>4</sup>            | 37 (15.1)        | 15 (14)                | 22 (16.1)               |                 |
|                                          |                                |                  |                        |                         |                 |
| Biotherapy, <i>n</i> (%)                 | None                           | 204 (83.6)       | 89 (83.2)              | 115 (83.9)              | 0.036           |
|                                          | Bevacizumab                    | 26 (10.7)        | 16 (15.0)              | 10 (7.3)                |                 |
|                                          | Others <sup>5</sup>            | 14 (5.7)         | 2 (1.8)                | 12 (8.8)                |                 |

|                            |     |            |           |            |       |
|----------------------------|-----|------------|-----------|------------|-------|
| Concomitant                | No  | 222 (91.0) | 99 (92.5) | 123 (89.8) | 0.605 |
| radiotherapy, <i>n</i> (%) | Yes | 22 (9.0)   | 8 (7.5)   | 14 (10.2)  |       |

Abbreviations: 5FU: 5 Fluorouracil; BMI: Body Mass Index; CRP: C-reactive protein; ECOG PS: Eastern Cooperative Oncology Group Criteria Performance Status; HGS: handgrip strength; IQR: interquartile range; mGPS: modified Glasgow prognosis score.

<sup>1</sup> According HGS cut-off based on the median in the population as HGS <34 for men and <22kg for women; <sup>2</sup> Data available for 82 patients; <sup>3</sup> Other localizations: biliary tract (*n*=8), small intestine (*n*=7), ampulla of Vater (*n*=3), neuroendocrine tumor (*n*=4), appendix (*n*=1), anal (*n*=1), unknown primary (*n*=1); <sup>4</sup> Other chemotherapy: 5FU + Irinotecan (*n*=8), 5FU + Oxaliplatin + Docetaxel (*n*=9), 5FU + Cisplatin (*n*=1), 5FU + Dacarbazine (*n*=3), Carboplatin-Etoposide (*n*=1), Gemcitabine + Cisplatin (*n*=4), Gemcitabine + Oxaliplatin (*n*=3), Capecitabine + Oxaliplatin (*n*=7), Capecitabine + Mitomycin (*n*=1); <sup>5</sup> Other biotherapy: Panitumumab (*n*=10), Trastuzumab (*n*=4).

**Supplementary Table S2.** Association between low hand grip strength based on the median (exploratory low HGS) and chemotherapy-induced toxicities and DLT (detailed grades and therapeutic modifications).

|                                      | Overall<br>( <i>n</i> = 244) | Dynapenia <sup>1</sup><br>( <i>n</i> = 23) | Normal HGS <sup>1</sup><br>( <i>n</i> = 221) | <i>p</i> value |
|--------------------------------------|------------------------------|--------------------------------------------|----------------------------------------------|----------------|
| <b>Neuropathy</b>                    |                              |                                            |                                              |                |
| Neuropathy (all grade), <i>n</i> (%) | 174 (94.6)                   | 66 (91.7)                                  | 108 (96.4)                                   | 0.193          |
| DLT, <i>n</i> (%)                    | 76 (41.3)                    | 26 (36.1)                                  | 50 (44.6)                                    | 0.285          |
| Toxicity grade 1, <i>n</i> (%)       | 103 (58.9)                   | 43 (64.2)                                  | 60 (55.6)                                    | 0.334          |
| Toxicity grade 2, <i>n</i> (%)       | 61 (34.9)                    | 19 (28.4)                                  | 42 (38.9)                                    |                |
| Toxicity grade 3, <i>n</i> (%)       | 11 (6.3)                     | 5 (7.5)                                    | 6 (5.6)                                      |                |
| Median appearance, days (IQR)        | 28.0 (14.0 - 42.0)           | 28.0 (14.0 - 42.0)                         | 28.0 (14.0 - 42.2)                           | 0.619          |
| Decrease of dose, <i>n</i> (%)       | 26 (14.1)                    | 12 (16.7)                                  | 14 (12.5)                                    | 0.717          |
| Discontinuation, <i>n</i> (%)        | 64 (34.8)                    | 19 (26.4)                                  | 45 (40.2)                                    | 0.152          |
| Delay of chemotherapy, <i>n</i> (%)  | 0                            |                                            |                                              |                |
| <b>Asthenia</b>                      |                              |                                            |                                              |                |
| Toxicity (all grade), <i>n</i> (%)   | 224 (91.8)                   | 104 (97.2)                                 | 120 (87.6)                                   | 0.014          |
| DLT, <i>n</i> (%)                    | 24 (9.8)                     | 16 (15.0)                                  | 8 (5.8)                                      | 0.029          |
| Toxicity grade 1, <i>n</i> (%)       | 145 (64.4)                   | 59 (56.7)                                  | 86 (71.1)                                    | 0.071          |
| Toxicity grade 2, <i>n</i> (%)       | 57 (25.3)                    | 31 (29.8)                                  | 26 (21.5)                                    |                |
| Toxicity grade 3, <i>n</i> (%)       | 23 (10.2)                    | 14 (13.5)                                  | 9 (7.4)                                      |                |
| Median appearance, days (IQR)        | 17.0 (14.0 - 39.0)           | 17.0 (14.0 - 29.2)                         | 17.0 (14.0 - 42.0)                           | 0.687          |
| Decrease of dose, <i>n</i> (%)       | 15 (6.1)                     | 9 (8.4)                                    | 6 (4.4)                                      | 0.002          |
| Discontinuation, <i>n</i> (%)        | 7 (2.9)                      | 5 (4.7)                                    | 2 (1.5)                                      | 0.001          |
| Delay of chemotherapy, <i>n</i> (%)  | 13 (5.3)                     | 9 (8.4)                                    | 4 (2.9)                                      | 0.001          |
| <b>Diarrhea</b>                      |                              |                                            |                                              |                |
| Toxicity (all grade), <i>n</i> (%)   | 139 (57.0)                   | 56 (52.3)                                  | 83 (60.6)                                    | 0.214          |
| DLT, <i>n</i> (%)                    | 20 (8.2)                     | 9 (8.4)                                    | 11 (8.0)                                     | 1.000          |
| Toxicity grade 1, <i>n</i> (%)       | 82 (59.4)                    | 25 (44.6)                                  | 57 (69.5)                                    | 0.015          |
| Toxicity grade 2, <i>n</i> (%)       | 40 (29.0)                    | 22 (39.3)                                  | 18 (22.0)                                    |                |
| Toxicity grade 3, <i>n</i> (%)       | 15 (10.9)                    | 8 (14.3)                                   | 7 (8.5)                                      |                |
| Toxicity grade 4, <i>n</i> (%)       | 1 (0.7)                      | 1 (1.8)                                    | 0                                            |                |
| Median appearance, days (IQR)        | 16.0 (14.0 - 42.0)           | 27.0 (14.0 - 42.0)                         | 15.0 (14.0 - 40.0)                           | 0.293          |
| Decrease of dose, <i>n</i> (%)       | 13 (5.3)                     | 5 (4.7)                                    | 8 (5.8)                                      | 0.550          |
| Discontinuation, <i>n</i> (%)        | 6 (2.5)                      | 4 (3.7)                                    | 2 (1.5)                                      | 0.242          |
| Delay of chemotherapy, <i>n</i> (%)  | 7 (2.9)                      | 4 (3.7)                                    | 3 (2.2)                                      | 0.324          |
| <b>Nausea<sup>3</sup></b>            |                              |                                            |                                              |                |
| Toxicity (all grade), <i>n</i> (%)   | 115 (56.9)                   | 41 (49.4)                                  | 74 (62.2)                                    | 0.084          |

|                                     |                    |                    |                    |       |
|-------------------------------------|--------------------|--------------------|--------------------|-------|
| DLT, <i>n</i> (%)                   | 4 (2.0)            | 2 (2.4)            | 2 (1.7)            | 1.000 |
| Toxicity grade 1, <i>n</i> (%)      | 76 (66.1)          | 24 (58.5)          | 52 (70.3)          | 0.437 |
| Toxicity grade 2, <i>n</i> (%)      | 35 (30.4)          | 15 (36.6)          | 20 (27.0)          |       |
| Toxicity grade 3, <i>n</i> (%)      | 4 (3.5)            | 2 (4.9)            | 2 (2.7)            |       |
| Median appearance, days (IQR)       | 15.0 (14.0 - 33.0) | 28.0 (14.0 - 42.0) | 14.5 (14.0 - 28.0) | 0.115 |
| Decrease of dose, <i>n</i> (%)      | 4 (2.0)            | 2 (2.4)            | 2 (1.7)            | 0.135 |
| Discontinuation, <i>n</i> (%)       | 1 (0.5)            | 1 (1.2)            | 0                  | 0.043 |
| Delay of chemotherapy, <i>n</i> (%) | 1 (0.5)            | 0                  | 1 (0.8)            | 0.110 |
| <b>Vomiting<sup>3</sup></b>         |                    |                    |                    |       |
| Toxicity (all grade), <i>n</i> (%)  | 51 (25.2)          | 15 (18.1)          | 36 (30.3)          | 0.047 |
| DLT, <i>n</i> (%)                   | 4 (2.0)            | 1 (1.2)            | 3 (2.5)            | 0.645 |
| Toxicity grade 1, <i>n</i> (%)      | 35 (67.3)          | 9 (60.0)           | 26 (70.3)          | 0.775 |
| Toxicity grade 2, <i>n</i> (%)      | 14 (26.9)          | 5 (33.3)           | 9 (24.3)           |       |
| Toxicity grade 3, <i>n</i> (%)      | 3 (5.8)            | 1 (6.7)            | 2 (5.4)            |       |
| Median appearance, days (IQR)       | 38.0 (15.0 - 77.2) | 42.0 (15.0 - 74.0) | 28.0 (15.0 - 77.0) | 0.871 |
| Decrease of dose, <i>n</i> (%)      | 2 (1.0)            | 0                  | 2 (1.7)            | 0.034 |
| Discontinuation, <i>n</i> (%)       | 2 (1.0)            | 0                  | 2 (1.7)            | 0.034 |
| Delay of chemotherapy, <i>n</i> (%) | 2 (1.0)            | 1 (1.2)            | 1 (0.8)            | 0.030 |
| <b>Neutropenia</b>                  |                    |                    |                    |       |
| Toxicity (all grade), <i>n</i> (%)  | 60 (24.6)          | 26 (24.3)          | 34 (24.8)          | 1.000 |
| DLT, <i>n</i> (%)                   | 28 (11.5)          | 10 (9.3)           | 18 (13.1)          | 0.172 |
| Toxicity grade 1, <i>n</i> (%)      | 11 (18.0)          | 7 (26.9)           | 4 (11.4)           | 0.086 |
| Toxicity grade 2, <i>n</i> (%)      | 21 (34.4)          | 6 (23.1)           | 15 (42.9)          |       |
| Toxicity grade 3, <i>n</i> (%)      | 24 (39.3)          | 9 (34.6)           | 15 (42.9)          |       |
| Toxicity grade 4, <i>n</i> (%)      | 5 (8.2)            | 4 (15.4)           | 1 (2.9)            |       |
| Median appearance, days (IQR)       | 37.5 (23.8 - 68.0) | 30.0 (19.2 - 51.0) | 41.5 (27.0 - 90.5) | 0.108 |
| Discontinuation, <i>n</i> (%)       | 1 (0.4)            | 0                  | 1 (0.7)            | 1.000 |
| Delay of chemotherapy, <i>n</i> (%) | 20 (8.2)           | 8 (7.5)            | 12 (8.8)           | 0.901 |
| <b>Anemia</b>                       |                    |                    |                    |       |
| Toxicity (all grade), <i>n</i> (%)  | 165 (67.6)         | 83 (77.6)          | 82 (59.9)          | 0.006 |
| DLT, <i>n</i> (%)                   | 6 (2.5)            | 4 (3.7)            | 2 (1.5)            | 0.409 |
| Toxicity grade 1, <i>n</i> (%)      | 102 (61.8)         | 48 (57.8)          | 54 (65.9)          | 0.345 |
| Toxicity grade 2, <i>n</i> (%)      | 48 (29.1)          | 25 (30.1)          | 23 (28.0)          |       |
| Toxicity grade 3, <i>n</i> (%)      | 15 (9.1)           | 10 (12.0)          | 5 (6.1)            |       |
| Median appearance, days (IQR)       | 15.0 (13.0 - 41.0) | 14.0 (13.0 - 29.5) | 26.5 (14.0 - 54.5) | 0.005 |
| Decrease of dose, <i>n</i> (%)      | 6 (2.5)            | 4 (3.7)            | 2 (1.5)            | 0.012 |

|                                       |                    |                    |                    |       |
|---------------------------------------|--------------------|--------------------|--------------------|-------|
| Discontinuation, <i>n</i> (%)         | 0                  |                    |                    |       |
| Delay of chemotherapy, <i>n</i> (%)   | 0                  |                    |                    |       |
| <b>Thrombopenia</b>                   |                    |                    |                    |       |
| Toxicity (all grade), <i>n</i> (%)    | 73 (29.9)          | 32 (29.9)          | 41 (29.9)          | 1.000 |
| DLT, <i>n</i> (%)                     | 13 (5.3)           | 5 (4.7)            | 8 (5.8)            | 0.779 |
| Toxicity grade 1, <i>n</i> (%)        | 58 (79.5)          | 27 (84.4)          | 31 (75.6)          | 0.288 |
| Toxicity grade 2, <i>n</i> (%)        | 12 (16.4)          | 3 (9.4)            | 9 (22.0)           |       |
| Toxicity grade 3, <i>n</i> (%)        | 3 (4.1)            | 2 (6.2)            | 1 (2.4)            |       |
| Median appearance, days (IQR)         | 53.0 (27.0 - 90.0) | 43.0 (25.2 - 71.5) | 60.0 (28.0 - 98.0) | 0.161 |
| Decrease of dose, <i>n</i> (%)        | 4 (1.6)            | 1 (0.9)            | 3 (2.2)            | 0.805 |
| Discontinuation, <i>n</i> (%)         | 1 (0.4)            | 4 (3.7)            | 1 (0.7)            | 0.937 |
| Delay of chemotherapy, <i>n</i> (%)   | 8 (3.3)            | 4 (3.7)            | 4 (2.9)            | 0.969 |
| <b>Oral Mucositis<sup>4</sup></b>     |                    |                    |                    |       |
| Toxicity (all grade), <i>n</i> (%)    | 29 (11.9)          | 15 (14.0)          | 14 (10.2)          | 0.455 |
| DLT, <i>n</i> (%)                     | 3 (1.2)            | 1 (0.9)            | 2 (1.5)            | 1.000 |
| Toxicity grade 1, <i>n</i> (%)        | 22 (78.6)          | 13 (86.7)          | 9 (69.2)           | 0.533 |
| Toxicity grade 2, <i>n</i> (%)        | 3 (10.7)           | 1 (6.7)            | 2 (15.4)           |       |
| Toxicity grade 3, <i>n</i> (%)        | 3 (10.7)           | 1 (6.7)            | 2 (15.4)           |       |
| Decrease of dose, <i>n</i> (%)        | 3 (1.2)            | 1 (0.9)            | 2 (1.5)            | 0.525 |
| Discontinuation, <i>n</i> (%)         | 0                  |                    |                    |       |
| Delay of chemotherapy, <i>n</i> (%)   | 0                  |                    |                    |       |
| <b>Hand Foot Syndrome<sup>4</sup></b> |                    |                    |                    |       |
| Toxicity (all grade), <i>n</i> (%)    | 10 (4.8)           | 5 (5.4)            | 5 (4.3)            | 0.629 |
| DLT, <i>n</i> (%)                     | 4 (1.9)            | 2 (2.2)            | 2 (1.7)            | 1.000 |
| Toxicity grade 1, <i>n</i> (%)        | 3 (30.0)           | 2 (40.0)           | 1 (20.0)           | 0.282 |
| Toxicity grade 2, <i>n</i> (%)        | 5 (50.0)           | 3 (60.0)           | 2 (40.0)           |       |
| Toxicity grade 3, <i>n</i> (%)        | 2 (20.0)           | 0                  | 2 (40.0)           |       |
| Median appearance, days (IQR)         | 53.0 (40.0 - 68.8) | 54.0 (37.0 - 70.0) | 52.0 (43.0 - 65.0) | 0.917 |
| Decrease of dose, <i>n</i> (%)        | 3 (1.4)            | 1 (1.1)            | 2 (1.7)            | 0.733 |
| Discontinuation, <i>n</i> (%)         | 1 (0.5)            | 1 (1.1)            | 0                  | 0.531 |
| Delay of chemotherapy, <i>n</i> (%)   | 0                  |                    |                    |       |

Abbreviation: DLT: Dose Limiting Toxicity; HGS: Hand Grip Strength; IQR: Interquartile

<sup>1</sup> HGS cut-off based on the median in the population as HGS <34 for men and <22kg for women (exploratory low HGS) ; <sup>2</sup> Only patients receiving neurotoxic chemotherapy (*n*=184), and graded according Levi scale ; <sup>3</sup> Patients receiving 5FU and gemcitabine alone were not analyzed for this adverse effect (*n*=202) ; <sup>4</sup> Only patients receiving 5FU- or capecitabine-based chemotherapy regimen (*n*=210).

**Supplementary Table S3.** Association between dynapenia based on EWSGOP2 criteria and chemotherapy-induced toxicities and DLT (detailed grades and therapeutic modifications).

|                                      | Overall<br>( <i>n</i> = 244) | Dynapenia <sup>1</sup><br>( <i>n</i> = 23) | Normal HGS <sup>1</sup><br>( <i>n</i> = 221) | <i>p</i> value |
|--------------------------------------|------------------------------|--------------------------------------------|----------------------------------------------|----------------|
| <b>Neuropathy<sup>2</sup></b>        |                              |                                            |                                              |                |
| Neuropathy (all grade), <i>n</i> (%) | 174 (94.6)                   | 14 (93.3)                                  | 160 (94.7)                                   | 0.582          |
| DLT, <i>n</i> (%)                    | 76 (41.3)                    | 7 (46.7)                                   | 69 (40.8)                                    | 0.786          |
| Toxicity grade 1, <i>n</i> (%)       | 103 (58.9)                   | 8 (53.3)                                   | 95 (59.4)                                    | 0.116          |
| Toxicity grade 2, <i>n</i> (%)       | 61 (34.9)                    | 4 (26.7)                                   | 57 (35.6)                                    |                |
| Toxicity grade 3, <i>n</i> (%)       | 11 (6.3)                     | 3 (20.0)                                   | 8 (5.0)                                      |                |
| Median appearance, days (IQR)        | 28.0 (14.0 - 42.0)           | 18.0 (14.0 - 42.0)                         | 28.0 (14.0 - 42.0)                           | 0.274          |
| Decrease of dose, <i>n</i> (%)       | 26 (14.1)                    | 6 (40.0)                                   | 20 (11.8)                                    | 0.025          |
| Discontinuation, <i>n</i> (%)        | 64 (34.8)                    | 3 (20.0)                                   | 61 (36.1)                                    | 0.335          |
| Delay of chemotherapy, <i>n</i> (%)  | 0                            |                                            |                                              |                |
| <b>Asthenia</b>                      |                              |                                            |                                              |                |
| Toxicity (all grade), <i>n</i> (%)   | 224 (91.8)                   | 23 (100.0)                                 | 201 (91.0)                                   | 0.303          |
| DLT, <i>n</i> (%)                    | 24 (9.8)                     | 5 (21.7)                                   | 19 (8.6)                                     | 0.059          |
| Toxicity grade 1, <i>n</i> (%)       | 145 (64.4)                   | 11 (47.8)                                  | 134 (66.3)                                   | 0.156          |
| Toxicity grade 2, <i>n</i> (%)       | 57 (25.3)                    | 8 (34.8)                                   | 49 (24.3)                                    |                |
| Toxicity grade 3, <i>n</i> (%)       | 23 (10.2)                    | 4 (17.4)                                   | 19 (9.4)                                     |                |
| Median appearance, days (IQR)        | 17.0 (14.0 - 39.0)           | 15.0 (14.0 - 28.0)                         | 19.0 (14.0 - 40.8)                           | 0.469          |
| Decrease of dose, <i>n</i> (%)       | 15 (6.1)                     | 3 (13.0)                                   | 12 (5.4)                                     | 0.093          |
| Discontinuation, <i>n</i> (%)        | 7 (2.9)                      | 2 (8.7)                                    | 5 (2.3)                                      | 0.062          |
| Delay of chemotherapy, <i>n</i> (%)  | 13 (5.3)                     | 3 (13.0)                                   | 10 (4.5)                                     | 0.071          |
| <b>Diarrhea</b>                      |                              |                                            |                                              |                |
| Toxicity (all grade), <i>n</i> (%)   | 139 (57.0)                   | 12 (52.2)                                  | 127 (57.5)                                   | 0.693          |
| DLT, <i>n</i> (%)                    | 20 (8.2)                     | 2 (8.7)                                    | 18 (8.1)                                     | 1.000          |
| Toxicity grade 1, <i>n</i> (%)       | 82 (59.4)                    | 5 (41.7)                                   | 77 (61.1)                                    | 0.071          |
| Toxicity grade 2, <i>n</i> (%)       | 40 (29.0)                    | 4 (33.3)                                   | 36 (28.6)                                    |                |
| Toxicity grade 3, <i>n</i> (%)       | 15 (10.9)                    | 2 (16.7)                                   | 13 (10.3)                                    |                |
| Toxicity grade 4, <i>n</i> (%)       | 1 (0.7)                      | 1 (8.3)                                    |                                              |                |
| Median appearance, days (IQR)        | 16.0 (14.0 - 42.0)           | 20.0 (14.0 - 29.0)                         | 15.0 (14.0 - 42.0)                           | 0.915          |
| Decrease of dose, <i>n</i> (%)       | 13 (5.3)                     | 0                                          | 13 (5.9)                                     | 0.760          |
| Discontinuation, <i>n</i> (%)        | 6 (2.5)                      | 1 (4.3)                                    | 5 (2.3)                                      | 0.482          |
| Delay of chemotherapy, <i>n</i> (%)  | 7 (2.9)                      | 1 (4.3)                                    | 6 (2.7)                                      | 0.367          |
| <b>Nausea<sup>3</sup></b>            |                              |                                            |                                              |                |
| Toxicity (all grade), <i>n</i> (%)   | 115 (56.9)                   | 9 (52.9)                                   | 106 (57.3)                                   | 0.801          |

|                                     |                    |                    |                    |       |
|-------------------------------------|--------------------|--------------------|--------------------|-------|
| DLT, <i>n</i> (%)                   | 4 (2.0)            | 1 (5.9)            | 3 (1.6)            | 0.298 |
| Toxicity grade 1, <i>n</i> (%)      | 76 (66.1)          | 6 (66.7)           | 70 (66.0)          | 0.380 |
| Toxicity grade 2, <i>n</i> (%)      | 35 (30.4)          | 2 (22.2)           | 33 (31.1)          |       |
| Toxicity grade 3, <i>n</i> (%)      | 4 (3.5)            | 1 (11.1)           | 3 (2.8)            |       |
| Median appearance, days (IQR)       | 15.0 (14.0 - 33.0) | 16.0 (15.0 - 42.0) | 15.0 (14.0 - 29.0) | 0.561 |
| Decrease of dose, <i>n</i> (%)      | 4 (2.0)            | 1 (5.9)            | 3 (1.6)            | 0.283 |
| Discontinuation, <i>n</i> (%)       | 1 (0.5)            | 0                  | 1 (0.5)            | 0.818 |
| Delay of chemotherapy, <i>n</i> (%) | 1 (0.5)            | 0                  | 1 (0.5)            | 0.818 |
| <b>Vomiting<sup>3</sup></b>         |                    |                    |                    |       |
| Toxicity (all grade), <i>n</i> (%)  | 51 (25.2)          | 3 (17.6)           | 48 (25.9)          | 0.605 |
| DLT, <i>n</i> (%)                   | 4 (2.0)            | 0                  | 4 (2.2)            | 1.000 |
| Toxicity grade 1, <i>n</i> (%)      | 35 (67.3)          | 1 (33.3)           | 34 (69.4)          | 0.102 |
| Toxicity grade 2, <i>n</i> (%)      | 14 (26.9)          | 1 (33.3)           | 13 (26.5)          |       |
| Toxicity grade 3, <i>n</i> (%)      | 3 (5.8)            | 1 (33.3)           | 2 (4.1)            |       |
| Median appearance, days (IQR)       | 38.0 (15.0 - 77.2) | 39.0 (27.0 - 48.5) | 37.0 (15.0 - 78.0) | 0.921 |
| Decrease of dose, <i>n</i> (%)      | 2 (1.0)            | 0                  | 2 (1.1)            | 0.637 |
| Discontinuation, <i>n</i> (%)       | 2 (1.0)            | 0                  | 2 (1.1)            | 0.637 |
| Delay of chemotherapy, <i>n</i> (%) | 2 (1.0)            | 0                  | 2 (1.1)            | 0.637 |
| <b>Neutropenia</b>                  |                    |                    |                    |       |
| Toxicity (all grade), <i>n</i> (%)  | 60 (24.6)          | 3 (13.0)           | 57 (25.8)          | 0.286 |
| DLT, <i>n</i> (%)                   | 28 (11.5)          | 0                  | 28 (12.7)          | 0.086 |
| Toxicity grade 1, <i>n</i> (%)      | 11 (18.0)          | 2 (66.7)           | 9 (15.5)           | 0.028 |
| Toxicity grade 2, <i>n</i> (%)      | 21 (34.4)          | 0                  | 21 (36.2)          |       |
| Toxicity grade 3, <i>n</i> (%)      | 24 (39.3)          | 0                  | 24 (41.4)          |       |
| Toxicity grade 4, <i>n</i> (%)      | 5 (8.2)            | 1 (33.3)           | 4 (6.9)            |       |
| Median appearance, days (IQR)       | 37.5 (23.8 - 68.0) | 26.0 (23.0 - 28.5) | 39.0 (25.0 - 68.0) | 0.277 |
|                                     | 11 (4.5)           | 0                  | 11 (5.0)           | 0.522 |
| Discontinuation, <i>n</i> (%)       | 20 (8.2)           | 0                  | 20 (9.0)           | 0.373 |
| Delay of chemotherapy, <i>n</i> (%) | 1 (0.4)            | 0                  | 1 (0.5)            | 0.369 |
| <b>Anemia</b>                       |                    |                    |                    |       |
| Toxicity (all grade), <i>n</i> (%)  | 165 (67.6)         | 19 (82.6)          | 146 (66.1)         | 0.238 |
| DLT, <i>n</i> (%)                   | 6 (2.5)            | 1 (4.3)            | 5 (2.3)            | 0.451 |
| Toxicity grade 1, <i>n</i> (%)      | 102 (61.8)         | 13 (68.4)          | 89 (61.0)          | 0.695 |
| Toxicity grade 2, <i>n</i> (%)      | 48 (29.1)          | 4 (21.1)           | 44 (30.1)          |       |
| Toxicity grade 3, <i>n</i> (%)      | 15 (9.1)           | 2 (10.5)           | 13 (8.9)           |       |
| Median appearance, days (IQR)       | 15.0 (13.0 - 41.0) | 14.0 (14.0 - 41.0) | 15.5 (13.0 - 41.0) | 0.912 |

|                                       |                    |                    |                    |       |
|---------------------------------------|--------------------|--------------------|--------------------|-------|
| Decrease of dose, <i>n</i> (%)        | 6 (2.5)            | 1 (4.3)            | 5 (2.3)            | 0.189 |
| Discontinuation, <i>n</i> (%)         | 0                  |                    |                    |       |
| Delay of chemotherapy, <i>n</i> (%)   | 0                  |                    |                    |       |
| <b>Thrombopenia</b>                   |                    |                    |                    |       |
| Toxicity (all grade), <i>n</i> (%)    | 73 (29.9)          | 10 (43.5)          | 63 (28.5)          | 0.235 |
| DLT, <i>n</i> (%)                     | 13 (5.3)           | 2 (8.7)            | 11 (5.0)           | 0.352 |
| Toxicity grade 1, <i>n</i> (%)        | 58 (79.5)          | 8 (80.0)           | 50 (79.4)          | 0.591 |
| Toxicity grade 2, <i>n</i> (%)        | 12 (16.4)          | 1 (10.0)           | 11 (17.5)          |       |
| Toxicity grade 3, <i>n</i> (%)        | 3 (4.1)            | 1 (10.0)           | 2 (3.2)            |       |
| Median appearance, days (IQR)         | 53.0 (27.0 - 90.0) | 55.5 (31.2 - 85.8) | 52.0 (27.0 - 88.0) | 0.810 |
| Decrease of dose, <i>n</i> (%)        | 4 (1.6)            | 0                  | 4 (1.8)            | 0.201 |
| Discontinuation, <i>n</i> (%)         | 1 (0.4)            | 0                  | 1 (0.5)            | 0.227 |
| Delay of chemotherapy, <i>n</i> (%)   | 8 (3.3)            | 2 (8.7)            | 6 (2.7)            | 0.121 |
| <b>Oral Mucositis<sup>4</sup></b>     |                    |                    |                    |       |
| Toxicity (all grade), <i>n</i> (%)    | 29 (11.9)          | 2 (8.7)            | 27 (12.2)          | 0.836 |
| DLT, <i>n</i> (%)                     | 3 (1.2)            | 0                  | 3 (1.4)            | 1.000 |
| Toxicity grade 1, <i>n</i> (%)        | 22 (78.6)          | 2 (100.0)          | 20 (76.9)          | 0.745 |
| Toxicity grade 2, <i>n</i> (%)        | 3 (10.7)           | 0                  | 3 (11.5)           |       |
| Toxicity grade 3, <i>n</i> (%)        | 3 (10.7)           | 0                  | 3 (11.5)           |       |
| Decrease of dose, <i>n</i> (%)        | 3 (1.2)            | 0                  | 3 (1.4)            | 0.805 |
| Discontinuation, <i>n</i> (%)         | 0                  |                    |                    |       |
| Delay of chemotherapy, <i>n</i> (%)   | 0                  |                    |                    |       |
| <b>Hand Foot Syndrome<sup>4</sup></b> |                    |                    |                    |       |
| Toxicity (all grade), <i>n</i> (%)    | 10 (4.8)           | 4 (18.2)           | 6 (3.2)            | 0.007 |
| DLT, <i>n</i> (%)                     | 4 (1.9)            | 2 (9.1)            | 2 (1.1)            | 0.075 |
| Toxicity grade 1, <i>n</i> (%)        | 3 (30.0)           | 1 (25.0)           | 2 (33.3)           | 0.329 |
| Toxicity grade 2, <i>n</i> (%)        | 5 (50.0)           | 3 (75.0)           | 2 (33.3)           |       |
| Toxicity grade 3, <i>n</i> (%)        | 2 (20.0)           | 0                  | 2 (33.3)           |       |
| Median appearance, days (IQR)         | 53.0 (40.0 - 68.8) | 62.0 (49.8 - 96.2) | 47.5 (40.0 - 61.8) | 0.394 |
| Decrease of dose, <i>n</i> (%)        | 3 (1.4)            | 1 (4.5)            | 2 (1.1)            | 0.007 |
| Discontinuation, <i>n</i> (%)         | 1 (0.5)            | 1 (4.5)            | 0                  | 0.001 |
| Delay of chemotherapy, <i>n</i> (%)   | 0                  |                    |                    |       |

Abbreviation: DLT: Dose Limiting Toxicity; HGS: Hand Grip Strength; IQR: Interquartile

<sup>1</sup> Dynapenia was defined according the EWGSOP2 as HGS <27kg for men and <16kg for women; <sup>2</sup> Only patients receiving neurotoxic chemotherapy (*n*=184), and graded according to Levi scale; <sup>3</sup> Patients receiving 5FU and gemcitabine alone were not analyzed for this adverse effect (*n*=202); <sup>4</sup> Only patients receiving 5FU- or capecitabine-based chemotherapy regimen (*n*=210).
